# Supplementary material for: Optimization of mechanical and dielectric properties of poly(urethane–urea)-based dielectric elastomers via the control of microstructure
Source: Royal Society of Chemistry journal article supplement (doi:10.1039/c7ra11309a), 2017-01-01
Supplement: c7ra11309a1.pdf [file c7ra11309a1.pdf]

## Supplementary Material

# Optimization of Mechanical and Dielectric Properties of Poly (urethane-urea)-based Dielectric Elastomers via Controlling Microstructure

Dong Xiang<sup>1</sup>, Miao Liu<sup>1</sup>, Guanliang Chen<sup>3</sup>, Teng Zhang<sup>4</sup>, Li Liu<sup>2\*</sup> and Yongri Liang<sup>1,\*</sup>

<sup>1</sup>College of Materials Science and Engineering, Beijing Key Lab of Special Elastomer Composite Materials, Beijing Institute of Petrochemical Technology, Beijing 102617, P. R. China

<sup>2</sup>State Key Laboratory of Chemical Resource Engineering, Beijing University of Chemical Technology, Beijing 100029, China

<sup>3</sup>Key Laboratory of Beijing City on Preparation and Processing of Novel Polymer Materials, Beijing University of Chemical Technology, Beijing 100029, P. R. China

<sup>4</sup>School of Electrical Engineering, Beijing Jiaotong University, Beijing 100044, P.R. China

**\*Corresponding Author**

**E-mail:** [liangyr@bipt.edu.cn](mailto:liangyr@bipt.edu.cn) (Yongri Liang), [liul@mail.buct.edu.cn](mailto:liul@mail.buct.edu.cn) (Li Liu)

## 1. TGA measurement

The thermogravimetric analysis (TGA) conducted on a Pyris 1 thermoanalyzer system (Perkin Elmer Corp. USA) with  $10^{\circ}\text{C min}^{-1}$  heating rate under  $\text{N}_2$  atmosphere. The samples for TGA were weighted about 5 mg.

The decomposition of HS take place first at around  $290^{\circ}\text{C}$  and the SS take place at around  $380^{\circ}\text{C}$ . The HS fractions are determined by first region of decomposition as shown in Figure S1.

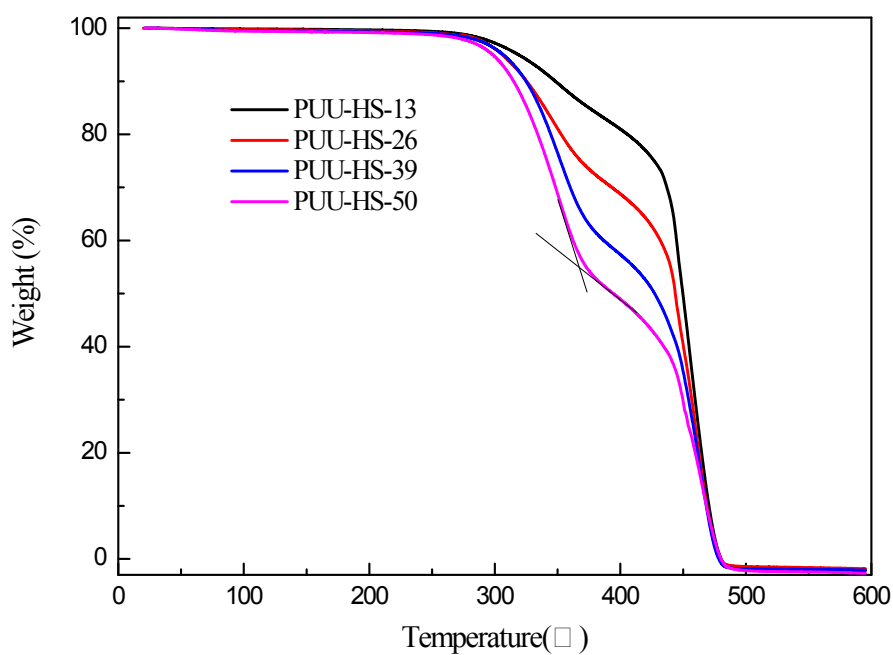

Figure S1: The TGA curves of PUUE with various HS content
